# Supplementary material for: Learning about Spatial and Temporal Proximity using Tree-Based Methods
Source: publisher site journal article supplement (doi:10.1515/spp-2021-0031), 2022-03-01
Supplement: Supplementary file 1 [file j_spp-2021-0031_suppl.docx]

Online Appendix

# Supplementary materials for: “Learning about Spatial and Temporal Proximity using Tree-Based Methods”

**Supplementary tables and figures**

**Figures**

| A1 | Hypothetical example: Distance to the border and support for pro- |  |
| --- | --- | --- |
|  | immigrant policies . . . . . . . . . . . . . . . . . . . . . . . . . . . . | 3 |
| A2 | Hypothetical example: Distance to the border and support for pro- |  |
|  | immigrant policies . . . . . . . . . . . . . . . . . . . . . . . . . . . . | 4 |
| B1 | Geographic distribution of simulated chain of events . . . . . . . . . | 5 |
| B2 | Example of single tree for linear DGP . . . . . . . . . . . . . . . . . . | 6 |
| B3 | Example of single tree for complex DGP . . . . . . . . . . . . . . . . | 7 |
| B4 | Distribution of mean squared errors (binary proximity indicators in |  |
|  | linear regression models) . . . . . . . . . . . . . . . . . . . . . . . . | 8 |
| B5 | Distribution of proportion incorrectly classified (categorical outcome |  |
|  | variable) . . . . . . . . . . . . . . . . . . . . . . . . . . . . . . . . . . | 9 |
| B6 | Distribution of mean squared errors (categorical outcome variable) . | 10 |
| C1 | Single-tree model of pro-immigration attitudes (10 splits) . . . . . . | 12 |
| D1 | Single-tree model of attitudes toward gun control (10 splits) . . . . . | 16 |
| **Tables** |  |  |
| C1 | Linear regression models of support for pro-immigration policies . . | 11 |
| D1 | Linear regression models of support for gun control . . . . . . . . . . | 14 |
| D2 | Linear regression models of support for gun control (controlling for |  |
|  | shooting characteristics) . . . . . . . . . . . . . . . . . . . . . . . . . | 15 |

# Simple hypothetical example

## Figure A1: Hypothetical example: Distance to the border and support for pro-immigrant policies


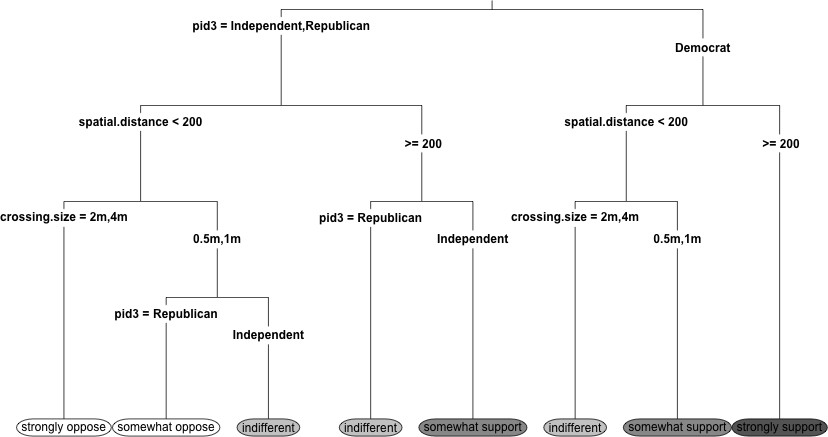


Note: The tree structure indicates how a series of decision rules (i.e. prescriptions for how to split the data based on values of predictive features) should be applied from top to bottom to produce the predictions shown in final nodes (at the bottom of the figure). For instance, this particular tree predicts that support for pro-immigrant policies is largest among Democrats living 200 km or more away from the border, and smallest among Independents and Republicans living less than 200 km from the border and close to a large entry point (with 2-4 million vehicle crossings per year).

## Figure A2: Hypothetical example: Distance to the border and support for pro-immigrant policies


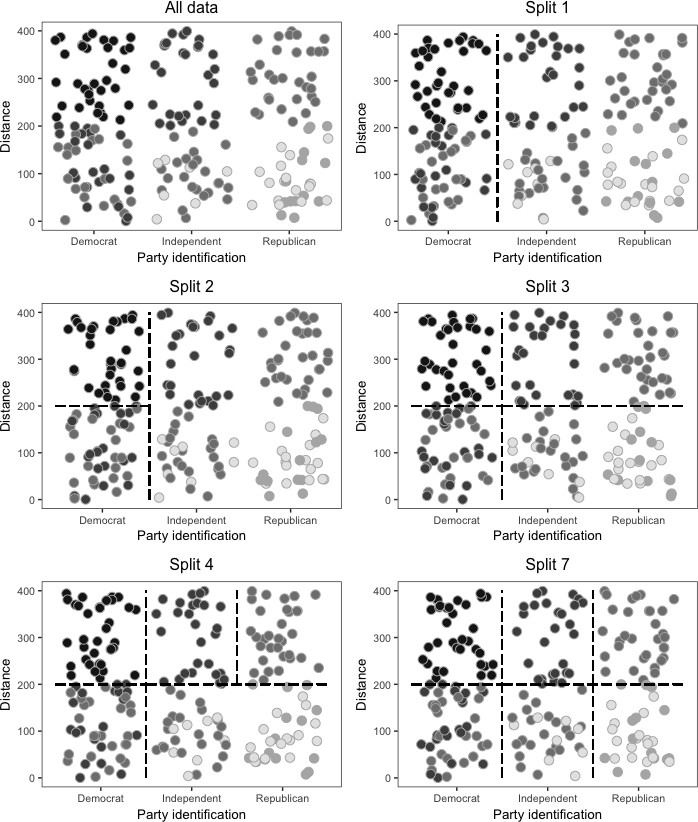


Note: The top-left plot depicts the relationship between party identification (hor- izontal axis), distance to the nearest border crossing (vertical axis), and support for pro-immigrant policies (circle fill, with darker shades representing greater sup- port), in a hypothetical data set. The rest of the plots depict the data-partitioning process corresponding to the regression tree shown in in Figure A1. First, the data is split based on Party identification (Split 1); among Democrats, and also among Independents and Republicans, it is then split based on distance to the border along a 200 km threshold (Splits 2 and 3, respectively); then among Independents and Republicans living more than 200 km away from the border, it is once again split based on party identification (Split 4). Splits 5-6, not shown, correspond to par- titioning done on the basis of size of the nearest border crossing (see Figure A1). Lastly, among Independents and Republicans living less than 200 km away from the border, the data is again split based on party identification (Split 7). Heterogeneity in outcome values within the bottom partitions occurs because of varying size of nearest border crossings (with larger size corresponding to less support).

# Simulation Study

## Figure B1: Geographic distribution of simulated chain of events


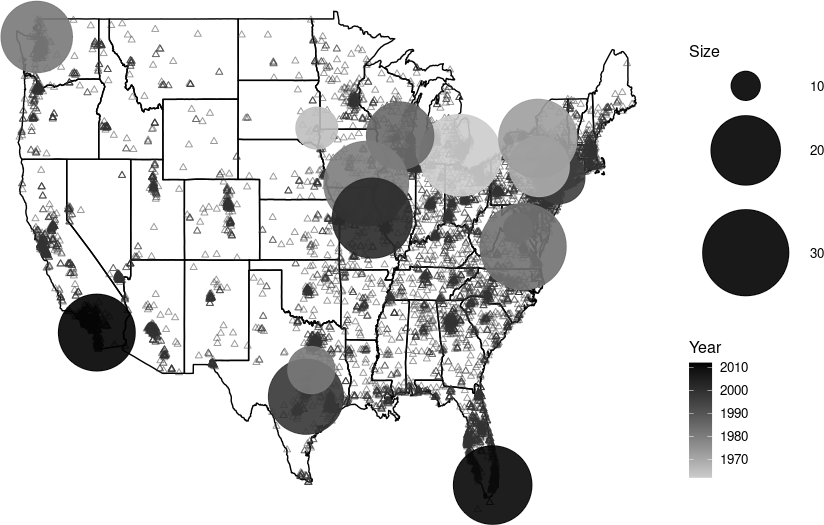


Note: Triangles represent survey respondents and circles represent hypothetical events. Darker triangles represent greater concentration of survey respondents. Larger circles indicate larger events. Darker circles indicate more recent events.

## Figure B2: Example of single tree for linear DGP


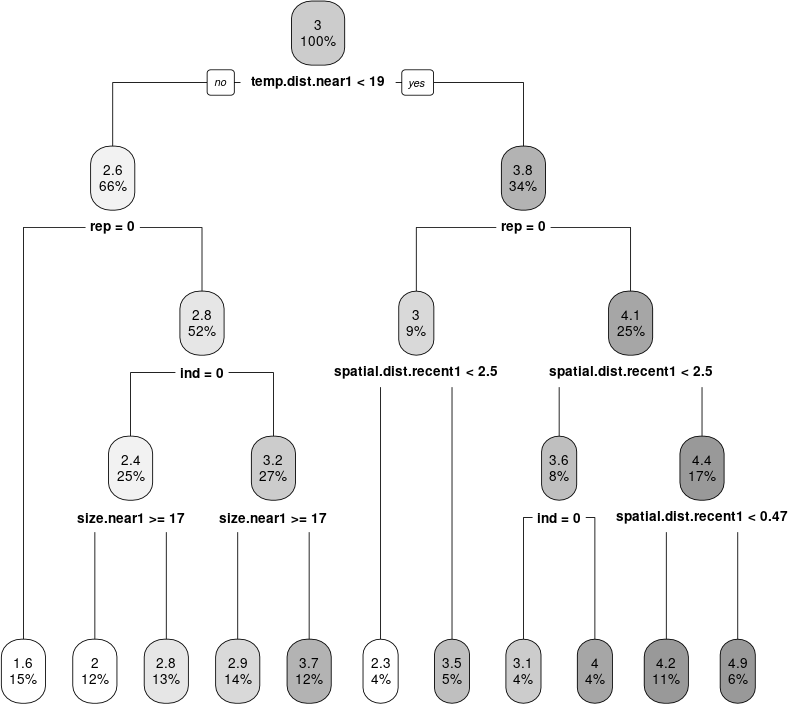


Note: The figure depicts a single-tree representation corresponding to a single simulation

for the linear DGP scenario.

## Figure B3: Example of single tree for complex DGP


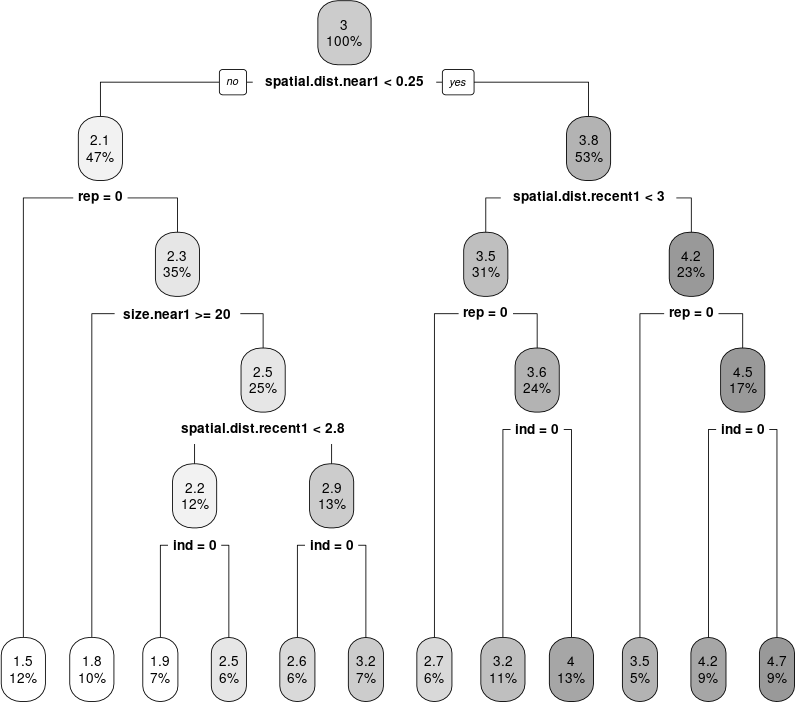


Note: The figure depicts a single-tree representation corresponding to a single simulation

for the complex DGP scenario.

## Figure B4: Distribution of mean squared errors (binary proximity indicators in linear regression models)


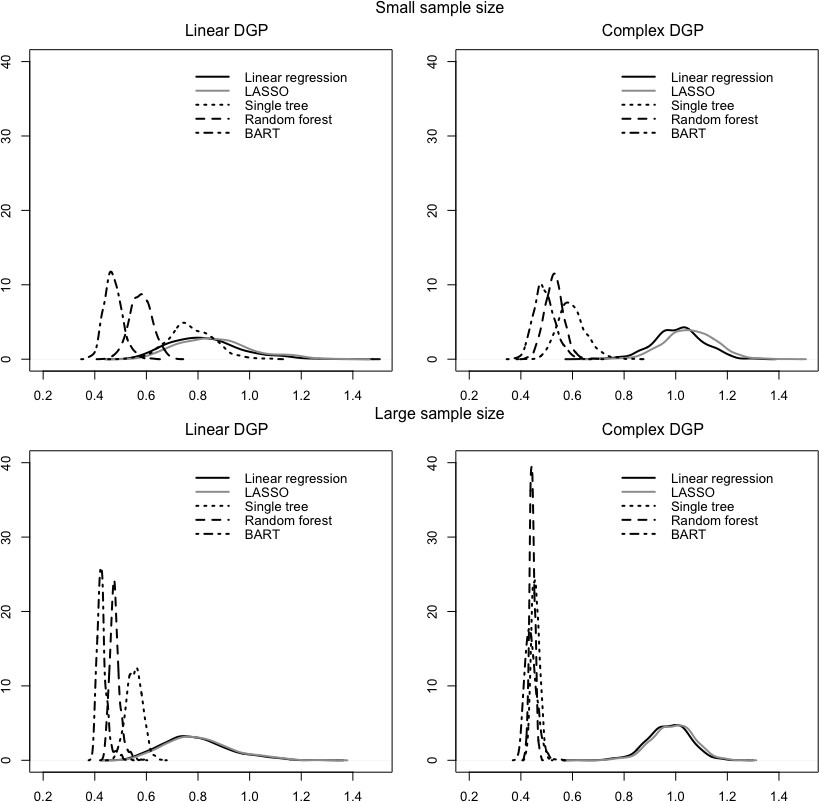


Note: The figure shows the distribution of MSEs in test data for each procedure (line type), sample size (rows), and type of DGP (columns). The five methods compared in each plot treat the 5-point outcome variable as continuous. In this figure, the linear regression models include binary indicators of proximity constructed under the wrong assumption about the threshold determining close proximity.

## Figure B5: Distribution of proportion incorrectly classified (categorical outcome variable)


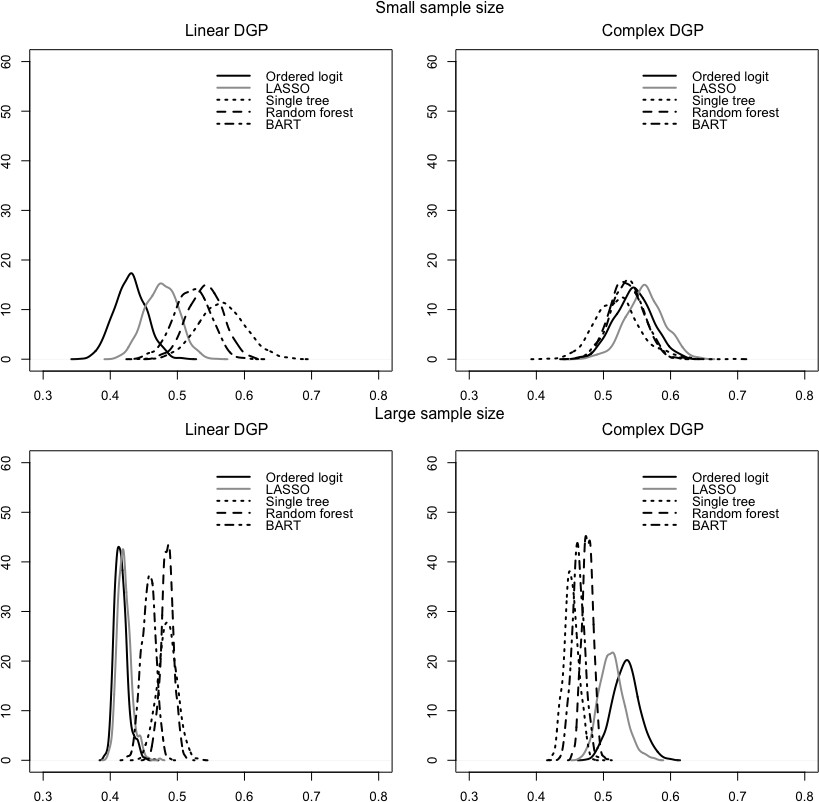


Note: The figure shows the distribution of proportion of observations incorrectly classified in test data for each procedure (line type), sample size (rows), and type of DGP (columns). The five methods compared in each plot treat the 5-point outcome variable as categorical, and all models include raw distances measured in km.

## Figure B6: Distribution of mean squared errors (categorical outcome variable)


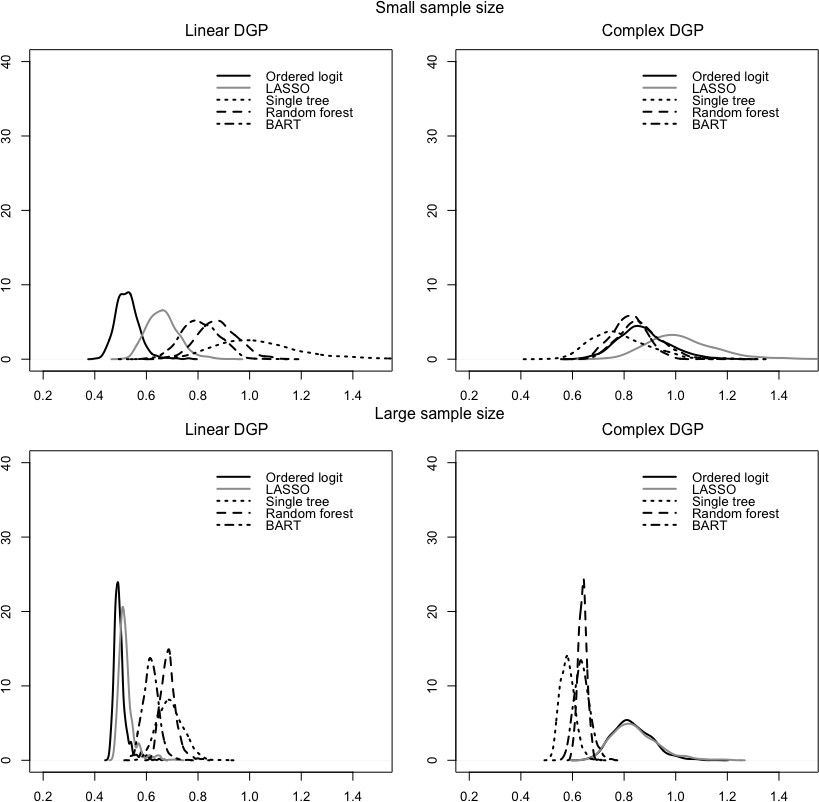


Note: The figure shows the distribution of MSEs in test data for each procedure (line type), sample size (rows), and type of DGP (columns). The five methods compared in each plot treat the 5-point outcome variable as categorical, and all models include raw distances measured in km. For the purpose of calculating MSEs after applying each model, I treated outcomes as numerical. For a measure of error that does not require making this assumption, see Figure B5.

# Border crossings and support for immigration re- form

## Table C1: Linear regression models of support for pro-immigration policies

| Model 1 | | | Model 2 | | Model 3 | |
| --- | --- | --- | --- | --- | --- | --- |
|  | coef. | s.e. | coef. | s.e. | coef. | s.e. |
| Intercept | 2.72 | 0.04 | 2.74 | 0.04 | 2.69 | 0.04 |
| Independent | -0.81 | 0.01 | -0.82 | 0.01 | -0.82 | 0.01 |
| Republican | -1.21 | 0.02 | -1.22 | 0.02 | -1.22 | 0.02 |
| Female | 0.18 | 0.01 | 0.18 | 0.01 | 0.18 | 0.01 |
| Age | -0.01 | 0.00 | -0.01 | 0.00 | -0.01 | 0.00 |
| Education | 0.09 | 0.01 | 0.09 | 0.01 | 0.09 | 0.01 |
| Black | 0.08 | 0.02 | 0.08 | 0.02 | 0.07 | 0.02 |
| Hispanic | 0.50 | 0.02 | 0.50 | 0.02 | 0.49 | 0.02 |
| Asian | 0.08 | 0.03 | 0.08 | 0.03 | 0.08 | 0.03 |
| Other | -0.10 | 0.03 | -0.10 | 0.03 | -0.10 | 0.03 |
| California | 0.23 | 0.04 | 0.18 | 0.03 | 0.19 | 0.02 |
| New Mexico | 0.18 | 0.04 | 0.11 | 0.04 | 0.15 | 0.04 |
| Texas | 0.32 | 0.03 | 0.25 | 0.02 | 0.29 | 0.02 |
| Year 2012 | 0.03 | 0.02 | 0.03 | 0.02 | 0.03 | 0.02 |
| Year 2014 | 0.11 | 0.02 | 0.11 | 0.02 | 0.11 | 0.02 |
| Year 2016 | 0.35 | 0.02 | 0.35 | 0.02 | 0.35 | 0.02 |
| Dist nearest | -0.16 | 0.07 |  |  |  |  |
| Vehicles nearest | -0.01 | 0.00 |  |  |  |  |
| Dist nearest x Vehicles nearest | 0.03 | 0.01 |  |  |  |  |
| Dist nearest *<* 0.25 & Vehicles nearest *<*= 3 |  |  | -0.06 | 0.02 |  |  |
| Dist nearest *<* 0.25 & Vehicles nearest *>* 3 |  |  | -0.08 | 0.02 |  |  |
| Dist nearest *<* 0.1 & Vehicles nearest *<*= 3 |  |  |  |  | -0.00 | 0.04 |
| Dist nearest *<* 0.1 & Vehicles nearest *>* 3 |  |  |  |  | -0.01 | 0.02 |
| Adj. *R*2 | 0.263 | | 0.263 | | 0.262 | |

Note: The table gives coefficients and standard errors for three different linear re- gression models of pro-immigrant attitudes estimated using ordinary least squares. Each model includes a different set of proximity indicators.

## Figure C1: Single-tree model of pro-immigration attitudes (10 splits)


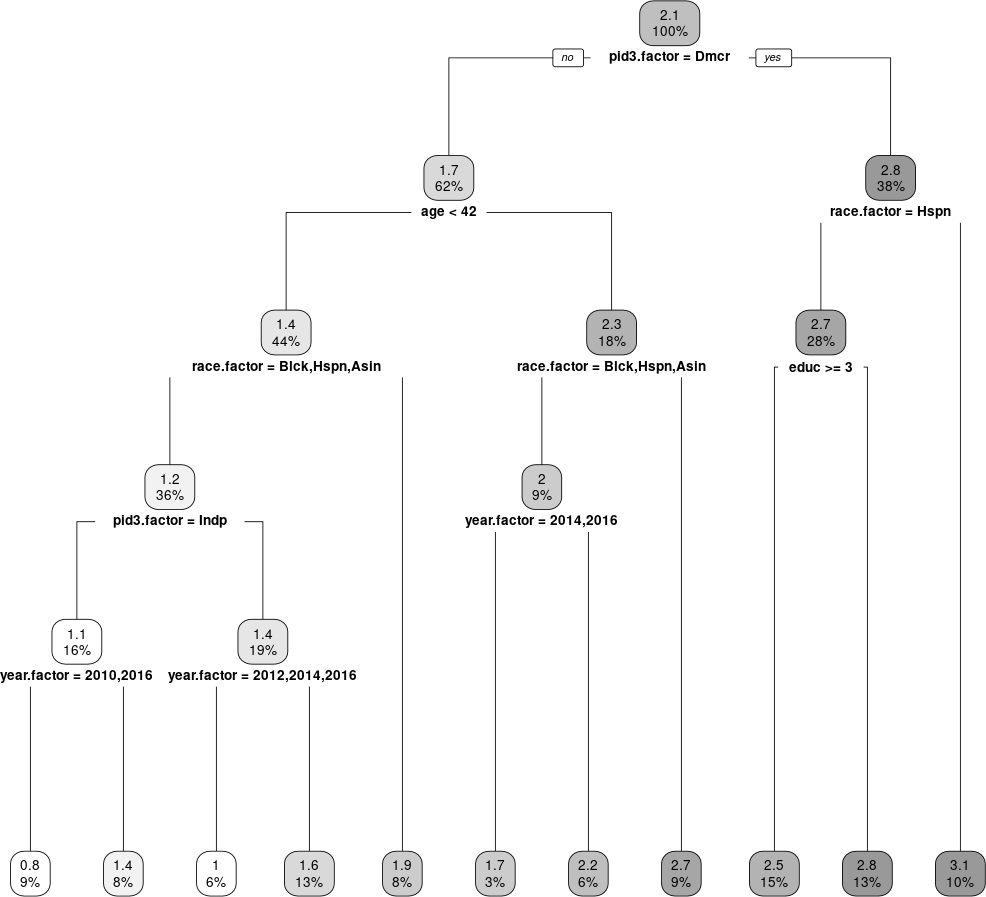


Note: The figure depicts a single-tree representation with 10 splits for the example given on section 4 on support for pro-immigration policies.

# Mass shootings and attitudes toward gun control

## Table D1: Linear regression models of support for gun control

| Model 1 | | | Model 2 | | Model 3 | |
| --- | --- | --- | --- | --- | --- | --- |
|  | coef. | s.e. | coef. | s.e. | coef. | s.e. |
| Intercept | 2.587 | 0.022 | 2.617 | 0.023 | 2.628 | 0.023 |
| Independent | -0.652 | 0.011 | -0.652 | 0.011 | -0.652 | 0.011 |
| Republican | -1.078 | 0.012 | -1.077 | 0.012 | -1.077 | 0.012 |
| Age | 0.003 | 0.000 | 0.003 | 0.000 | 0.003 | 0.000 |
| Education | 0.067 | 0.005 | 0.067 | 0.005 | 0.068 | 0.005 |
| Black | 0.056 | 0.015 | 0.053 | 0.015 | 0.055 | 0.015 |
| Hispanic | 0.038 | 0.015 | 0.037 | 0.015 | 0.035 | 0.015 |
| Asian | 0.288 | 0.026 | 0.286 | 0.026 | 0.285 | 0.026 |
| Other | -0.302 | 0.025 | -0.301 | 0.025 | -0.301 | 0.025 |
| Democratic state | 0.063 | 0.011 | 0.049 | 0.011 | 0.045 | 0.011 |
| Republican state | -0.051 | 0.012 | -0.048 | 0.012 | -0.053 | 0.012 |
| Crime victim | -0.173 | 0.020 | -0.172 | 0.020 | -0.173 | 0.020 |
| Spat. dist. nearest | -0.542 | 0.052 |  |  |  |  |
| Avg. spat. dist. 2 nearest |  |  | -0.569 | 0.050 |  |  |
| Avg. spat. dist. 3 nearest |  |  |  |  | -0.517 | 0.047 |
| Adj. *R*2 | 0.196 | | 0.197 | | 0.197 | |

Note: The table gives coefficients and standard errors for three different linear regression models of support for gun control estimated using ordinary least squares. Each model includes a different distance measure.

## Table D2: Linear regression models of support for gun control (controlling for shooting characteristics)

| Model 4 | | | Model 5 | | Model 6 | |
| --- | --- | --- | --- | --- | --- | --- |
|  | coef. | s.e. | coef. | s.e. | coef. | s.e. |
| Intercept | 2.407 | 0.029 | 2.262 | 0.038 | 2.324 | 0.037 |
| Independent | -0.652 | 0.011 | -0.651 | 0.011 | -0.651 | 0.011 |
| Republican | -1.078 | 0.012 | -1.075 | 0.012 | -1.075 | 0.012 |
| Female | 0.446 | 0.009 | 0.447 | 0.009 | 0.447 | 0.009 |
| Age | 0.004 | 0.000 | 0.004 | 0.000 | 0.004 | 0.000 |
| Education | 0.067 | 0.005 | 0.067 | 0.005 | 0.068 | 0.005 |
| Black | 0.043 | 0.015 | 0.050 | 0.015 | 0.058 | 0.015 |
| Hispanic | 0.040 | 0.015 | 0.040 | 0.015 | 0.040 | 0.015 |
| Asian | 0.299 | 0.026 | 0.296 | 0.026 | 0.292 | 0.026 |
| Other | -0.293 | 0.025 | -0.293 | 0.025 | -0.295 | 0.025 |
| Democratic state | 0.098 | 0.011 | 0.048 | 0.012 | 0.021 | 0.012 |
| Republican state | -0.033 | 0.012 | 0.007 | 0.013 | 0.012 | 0.014 |
| Crime victim | -0.166 | 0.020 | -0.164 | 0.020 | -0.166 | 0.020 |
| Spat. distance nearest | -0.468 | 0.053 |  |  |  |  |
| Temp. distance nearest | 0.000 | 0.001 |  |  |  |  |
| pat. dist. most recent | 0.050 | 0.005 |  |  |  |  |
| Fatalties nearest | -0.000 | 0.001 |  |  |  |  |
| School setting nearest | -0.005 | 0.013 |  |  |  |  |
| Avg. spat. dist. 2 nearest |  |  | -0.480 | 0.051 |  |  |
| Avg. temp. dist. 2 nearest |  |  | 0.001 | 0.001 |  |  |
| Avg. spat. dist. 2 most recent |  |  | 0.141 | 0.013 |  |  |
| Avg. fatalities 2 nearest |  |  | 0.000 | 0.001 |  |  |
| Prop. school setting 2 nearest |  |  | -0.022 | 0.019 |  |  |
| Avg. spat. dist. 3 nearest |  |  |  |  | -0.461 | 0.047 |
| Avg. temp. dist. 3 nearest |  |  |  |  | 0.001 | 0.001 |
| Avg. spat. dist. 3 most recent |  |  |  |  | 0.137 | 0.014 |
| Avg. fatalities 3 nearest |  |  |  |  | -0.000 | 0.001 |
| Prop. school setting 3 nearest |  |  |  |  | -0.030 | 0.022 |
| Adj. *R*2 | 0.198 | | 0.199 | | 0.198 | |

Note: The table gives coefficients and standard errors for three different linear re- gression models of support for gun control estimated using ordinary least squares. Each model includes a different distance measure and indicators of shooting char- acteristics.

## Figure D1: Single-tree model of attitudes toward gun control (10 splits)


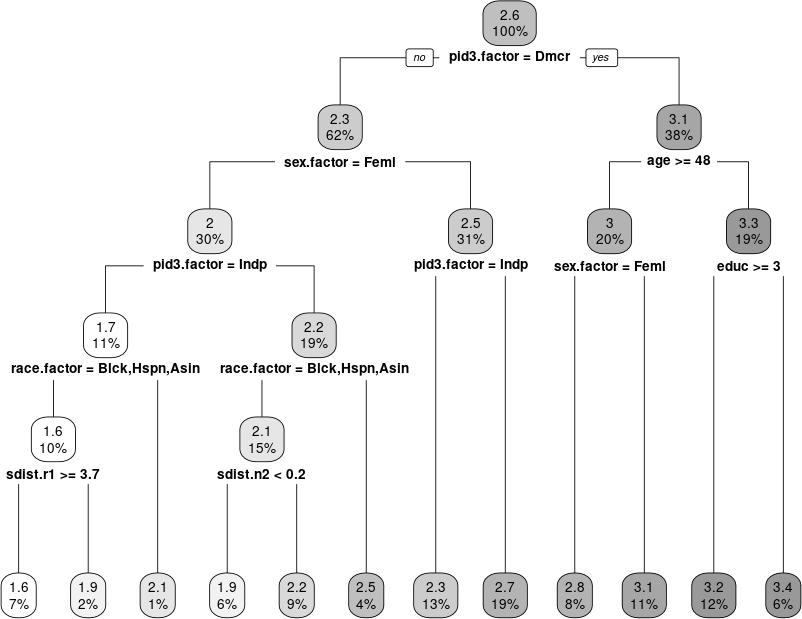


Note: The figure depicts a single-tree representation with 10 splits for the example given on section 5 on support for gun control.
